# Supplementary material for: A sensitive assay for measuring whole-blood responses to type I IFNs
Source: PubMed Central journal article supplement (PMC11459193; doi:10.1073/pnas.2402983121), 2024-09-23
Supplement: pnas.2402983121.sapp.pdf [file pnas.2402983121.sapp.pdf]

## Supplementary Information for

### A sensitive assay for measuring whole-blood responses to type I IFNs

Adrian Gervais, Corentin Le Floc'h, Tom Le Voyer, Lucy Bizien, Jonathan Bohlen, Fatih Celmeli, Fahd Al-Qureshah, Cécile Masson, Jérémie Rosain, Marwa Chbihi, Romain Lévy, Riccardo Castagnoli, Anya Rothenbuhler, Emmanuelle Jouanguy, Qian Zhang, Shen-Ying Zhang, Vivien Béziat, Jacinta Bustamante,

Anne Puel\*, Paul Bastard\*, Jean-Laurent Casanova\*<sup>@</sup>

\* Equal contributions

<sup>@</sup> Correspondence: casanova@rockefeller.edu

### This PDF file includes:

Figures S1 to S2

# Supplemental Figure 1

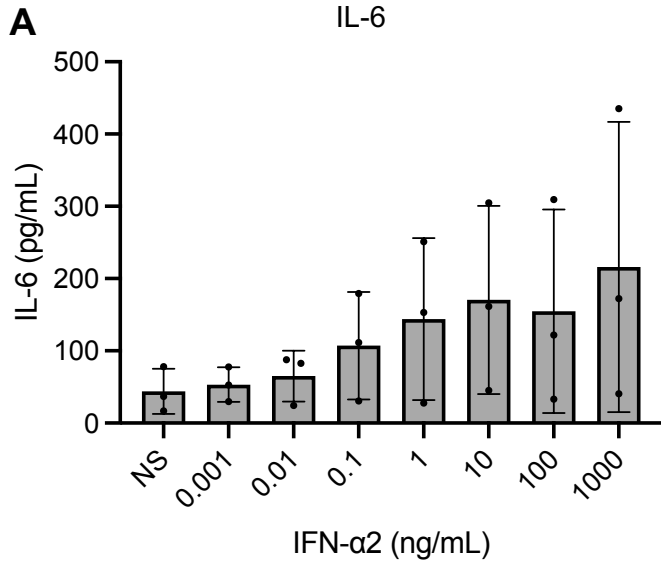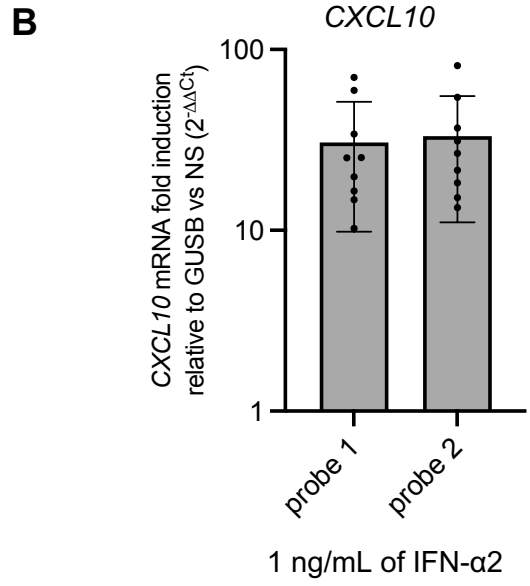

# Supplemental Figure 2

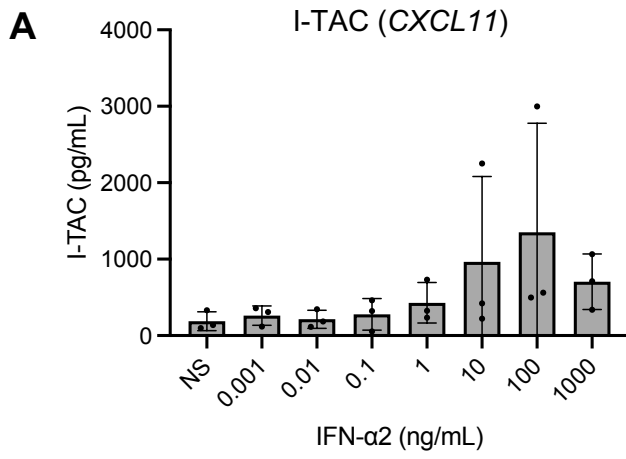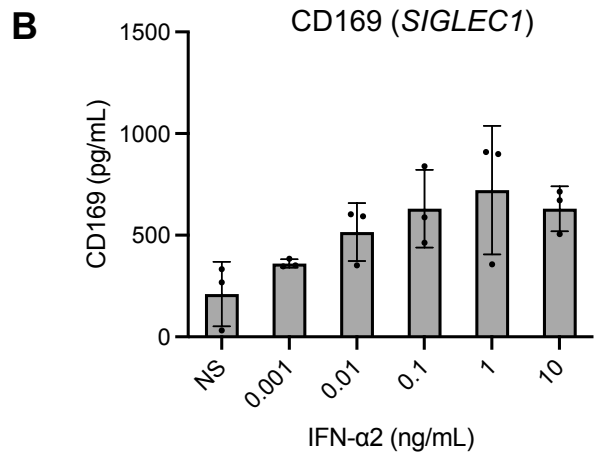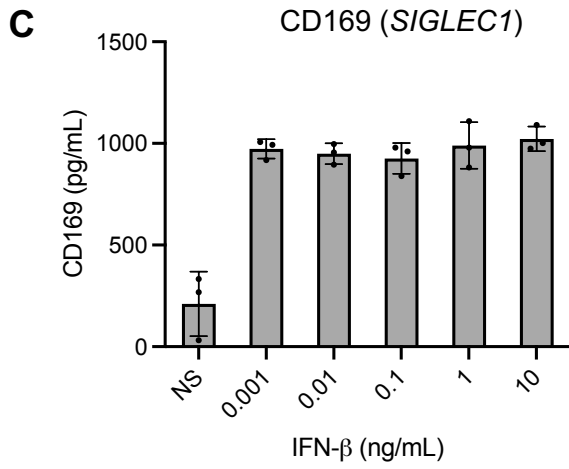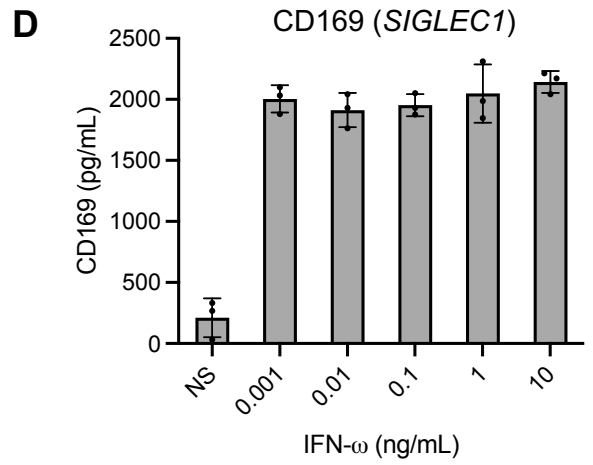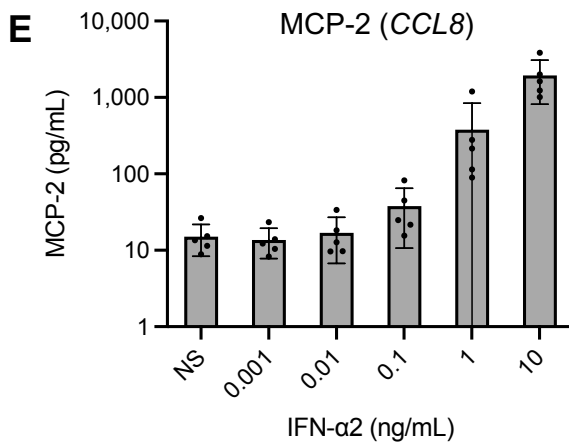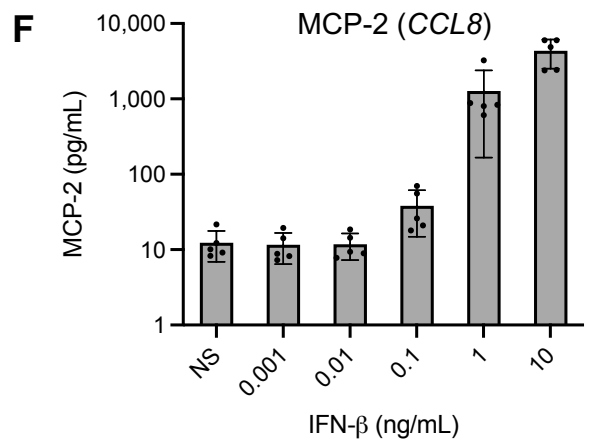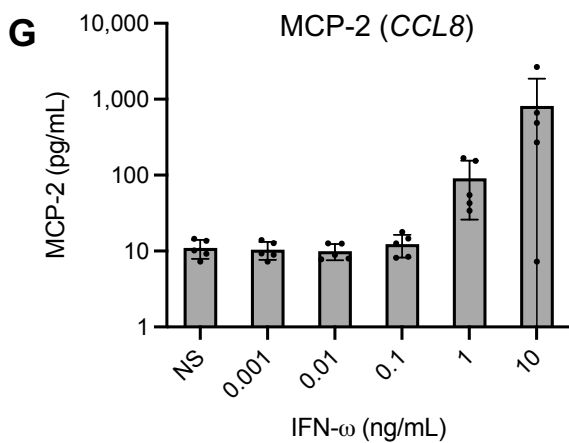

## Supplementary Figures

### Supplemental figure 1

(A) IL-6 induction after the stimulation of whole blood from three healthy donors with various concentrations of glycosylated IFN- $\alpha$ 2 for 16 h. IL-6 levels were assessed in plasma supernatants by LEGENDplex™. (B) *CXCL10* fold-induction after the stimulation of PBMCs from nine healthy donors with 1 ng/mL glycosylated IFN- $\alpha$ 2 for 6 h, as assessed by RT-qPCR.

### Supplemental figure 2

**Assessment of other potential target proteins after the stimulation of whole blood from healthy donors with type I IFNs** (A) I-TAC induction after the stimulation of whole blood from three healthy donors with various concentrations of glycosylated IFN- $\alpha$ 2 for 16 h. I-TAC levels were assessed in plasma supernatants by LEGENDplex™. (B-D) CD169 induction after the stimulation of whole blood from three healthy donors with glycosylated IFN- $\alpha$ 2, IFN- $\beta$  or IFN- $\omega$ . CD169 levels were assessed by ELISA. (E-G) MCP-2 induction after the stimulation of whole blood from three healthy donors with various concentrations of glycosylated IFN- $\alpha$ 2, IFN- $\beta$  and IFN- $\omega$ . MCP-2 levels were assessed in plasma supernatants by LEGENDplex™.
